# Normalization of the microbiota in patients after treatment for colonic lesions

Marc A Sze<sup>1</sup>, Nielson T Baxter<sup>1,2</sup>, Mack T Ruffin IV<sup>3</sup>, Mary AM Rogers<sup>2</sup>, and Patrick D  
Schloss<sup>1†</sup>

† To whom correspondence should be addressed: [pschloss@umich.edu](mailto:pschloss@umich.edu)

1 Department of Microbiology and Immunology, University of Michigan, Ann Arbor, MI

2 Department of Internal Medicine, University of Michigan, Ann Arbor, MI

3 Department of Family Medicine and Community Medicine, Penn State Hershey Medical  
Center, Hershey, PA

Co-author e-mails:

- [marcsze@med.umich.med.edu](mailto:marcsze@med.umich.med.edu)
- [ntbaxter@umich.edu](mailto:ntbaxter@umich.edu)
- [mruffin@pennstatehealth.psu.edu](mailto:mruffin@pennstatehealth.psu.edu)
- [maryroge@med.umich.edu](mailto:maryroge@med.umich.edu)

## 1 **Abstract**

2 **Background.** Colorectal cancer is a worldwide health problem. Despite growing evidence  
3 that members of the gut microbiota can drive tumorigenesis, little is known about what  
4 happens to it after treatment for an adenoma or carcinoma. This study tested the hypothesis  
5 that treatment for adenoma or carcinoma alters the abundance of bacterial populations  
6 associated with disease to those associated with a normal colon. We tested this hypothesis  
7 by sequencing the 16S rRNA genes in the feces of 67 individuals before and after treatment  
8 for adenoma (N = 22), advanced adenoma (N = 19), and carcinoma (N = 26).

9 **Results.** There were small changes to the bacterial community associated with  
10 adenoma or advanced adenoma and large changes associated with carcinoma. The  
11 communities from patients with carcinomas changed significantly more than those with  
12 adenoma following treatment (P-value < 0.001). Although treatment was associated with  
13 intrapersonal changes, the change in the abundance of individual OTUs in response  
14 to treatment was not consistent within diagnosis groups (P-value > 0.05). Because the  
15 distribution of OTUs across patients and diagnosis groups was irregular, we used the  
16 Random Forest machine learning algorithm to identify groups of OTUs that could be used  
17 to classify pre and post-treatment samples for each of the diagnosis groups. Although  
18 the adenoma and carcinoma models could reliably differentiate between the pre and  
19 post-treatment samples (P-value < 0.001), the advanced-adenoma model could not  
20 (P-value = 0.61). Furthermore, there was little overlap between the OTUs that were  
21 indicative of each treatment. To determine whether individuals who underwent treatment  
22 were more likely to have OTUs associated with normal colons we used a larger cohort that  
23 contained individuals with normal colons and those with adenomas, advanced adenomas,  
24 and carcinomas. We again built Random Forest models and measured the change  
25 in the positive probability of having one of the three diagnoses to assess whether the  
26 post-treatment samples received the same classification as the pre-treatment samples.

27 Samples from patients who had carcinomas changed towards a microbial milieu that  
28 resembles the normal colon after treatment (P-value < 0.001). Finally, we were unable to  
29 detect any significant differences in the microbiota of individuals treated with surgery alone  
30 and those treated with chemotherapy or chemotherapy and radiation (P-value > 0.05).

31 **Conclusions.** By better understanding the response of the microbiota to treatment for  
32 adenomas and carcinomas, it is likely that biomarkers will eventually be validated that can  
33 be used to quantify the risk of recurrence and the likelihood of survival. Although it was  
34 difficult to identify significant differences between pre and post-treatment samples from  
35 patients with adenoma and advanced adenoma, this was not the case for carcinomas.  
36 Not only were there large changes in pre versus post-treatment samples for those with  
37 carcinoma, but these changes were towards a more normal microbiota.

### 38 **Keywords**

39 microbiota; colorectal cancer; polyps; treatment; risk factor.

## 40 **Background**

41 Colorectal cancer (CRC) is the third most common cause of cancer deaths in the United  
42 States (1, 2). Disease mortality has significantly decreased, predominately due to  
43 improvements in screening (2). Despite these improvements, there are still approximately  
44 50,000 CRC-related deaths per year in the United States (1). Current estimates indicate  
45 that 20-30% of those who undergo treatment will experience recurrence and 35% of all  
46 patients will die within five years (3–5). Identification of methods to assess patients' risk of  
47 recurrence is of great importance to reduce mortality and healthcare costs.

48 There is growing evidence that the gut microbiota is involved in the progression of CRC.  
49 Mouse-based studies have identified populations of *Bacteroides fragilis*, *Escherichia coli*,  
50 and *Fusobacterium nucleatum* that alter disease progression (6–10). Furthermore, studies  
51 that shift the structure of the microbiota through the use of antibiotics or inoculation of  
52 germ free mice with human feces have shown that varying community compositions can  
53 result in varied tumor burden (11–13). Collectively, these studies support the hypothesis  
54 that the microbiota can alter the amount of inflammation in the colon and with it the rate of  
55 tumorigenesis (14).

56 Building upon this evidence, several human studies have identified unique signatures of  
57 colonic lesions (15–20). One line of research has identified community-level differences  
58 between those bacteria that are found on and adjacent to colonic lesions and have  
59 supported a role for *Bacteroides fragilis*, *Escherichia coli*, and *Fusobacterium nucleatum*  
60 in tumorigenesis (21–23). Others have proposed feces-based biomarkers that could be  
61 used to diagnose the presence of colonic adenomas and carcinomas (24–26). These  
62 studies have associated *Fusobacterium nucleatum* and other oral pathogens with colonic  
63 lesions (adenoma, advanced adenoma, and carcinoma). They have also noted that the  
64 loss of bacteria generally thought to produce short chain fatty acids, which can suppress

65 inflammation, is associated with colonic lesions. This suggests that gut bacteria have a  
66 role in tumorigenesis with potential as useful biomarkers for aiding in the early detection of  
67 disease (21–26).

68 Despite advances in understanding the role between the gut microbiota and colonic  
69 tumorigenesis, we still do not understand how treatments including resection,  
70 chemotherapy, and/or radiation affect the composition of the gut microbiota. If the  
71 microbial community drives tumorigenesis then one would hypothesize that treatment to  
72 remove a lesion would not only remove the lesion, but also the microbiota that promoted  
73 the tumorigenesis and hence the risk of recurrence. To test this hypothesis, we addressed  
74 two related questions: Does treatment affect the colonic microbiota in a predictable  
75 manner? If so, does the treatment alter the community to more closely resemble that of  
76 individuals with normal colons?

77 We answered these questions by sequencing the V4 region of 16S rRNA genes amplified  
78 from fecal samples of individuals with adenoma, advanced adenoma, and carcinomas  
79 pre and post-treatment. We used classical community analysis to compare the alpha  
80 and beta-diversity of communities pre and post-treatment. Next, we generated Random  
81 Forest models to identify bacterial populations that were indicative of treatment for each  
82 diagnosis group. Finally, we measured the predictive probabilities to assess whether  
83 treatment yielded bacterial communities similar to those individuals with normal colons.  
84 We found that treatment alters the composition of the gut microbiota and that, for those  
85 with carcinomas, the gut microbiota shifted more towards that of a normal colon after  
86 treatment. In the individuals with carcinomas, no difference was found by the type of  
87 treatment (surgery alone, surgery with chemotherapy, surgery with chemotherapy and  
88 radiation). Understanding how the community responds to these treatments could be a  
89 valuable tool for identifying biomarkers to quantify the risk of recurrence and the likelihood  
90 of survival.

## 91 Results

92 ***Treatment for colonic lesions alters the bacterial community structure*** Within our  
93 67-person cohort we tested whether the microbiota of patients with adenoma (N = 22),  
94 advanced adenoma (N = 19), or carcinoma (N = 26) had any broad differences between  
95 pre and post-treatment samples [Table 1]. None of the individuals in this study had  
96 any recorded antibiotic usage that was not associated with surgical treatment of their  
97 respective lesion. The structure of the microbial communities of the pre and post-treatment  
98 samples differed, as measured by the  $\theta_{YC}$  beta diversity metric [Figure 1A]. We found that  
99 the communities obtained pre and post-treatment among the patients with carcinomas  
100 changed significantly more than those patients with adenoma (P-value < 0.001). There  
101 were no significant differences in the amount of change observed between the patients  
102 with adenoma and advanced adenoma or between the patients with advanced adenoma  
103 and carcinoma (P-value > 0.05). Next, we tested whether there was a consistent direction  
104 in the change in the community structure between the pre and post-treatment samples  
105 for each of the diagnosis groups [Figure 1B-D]. We only observed a consistent shift in  
106 community structure for the patients with carcinoma when using a PERMANOVA test  
107 (adenoma P-value = 0.999, advanced adenoma P-value = 0.945, and carcinoma P-value  
108 = 0.005). Finally, we measured the number of observed OTUs, Shannon evenness, and  
109 Shannon diversity in the pre and post-treatment samples and did not observe a significant  
110 change for any of the diagnosis groups (P-value > 0.05) [Table S1].

111 ***The treatment of lesions are not consistent across diagnosis groups.*** We used two  
112 approaches to identify those bacterial populations that change between the two samples  
113 for each diagnosis group. First, we sought to identify individual OTUs that could account for  
114 the change in overall community structure. However, using a paired Wilcoxon test we were  
115 unable to identify any OTUs that were significantly different in the pre and post-treatment  
116 groups (P-value > 0.05). It is likely that high inter-individual variation and the irregular

117 distribution of OTUs across individuals limited the statistical power of the test. We attempted  
118 to overcome these problems by using Random Forest models to identify collections of  
119 OTUs that would allow us to differentiate between pre and post-treatment samples from  
120 each of the diagnosis groups. The adenoma and carcinoma models performed well  
121 (adenoma AUC range = 0.54 - 0.83 and carcinoma AUC range = 0.82 - 0.98); however, the  
122 model for patients treated for advanced adenomas was not able to reliably differentiate  
123 between the pre and post-treatment samples (advanced adenoma AUC range = 0.34 -  
124 0.65). Interestingly, the top 10 most important OTUs by MDA that were used for each  
125 model had little overlap with each other [Figure 2]. Although treatment had an impact on  
126 the overall community structure, the effect of treatment was not consistent across patients  
127 and diagnosis groups. Both the adenoma and carcinoma treatment models had AUCs that  
128 were significantly higher than a random model permutation (P-value < 0.0001).

129 ***Post-treatment samples from patients with carcinoma more closely resemble those***  
130 ***of a normal colon.*** Next, we determined whether treatment changed the microbiota in a  
131 way that the post-treatment communities resembled that of patients with normal colons.  
132 To test this, we used an expanded cohort of 423 individuals that were diagnosed under  
133 the same protocol as having normal colons or colons with adenoma, advanced adenoma,  
134 or carcinoma [Table 2]. We then constructed Random Forest models to classify the study  
135 samples, with the 3 diagnosis groups (adenoma, advanced adenoma, or carcinoma), or  
136 having a normal colon. The models performed moderately with CRC being the best  
137 (adenoma AUC range = 0.50 - 0.62, advanced adenoma AUC range = 0.53 - 0.67,  
138 carcinoma AUC range = 0.71 - 0.82; Figure S1). The OTUs that were in the top 10%  
139 of importance for the adenoma and advanced adenoma models largely overlapped and  
140 those OTUs that were used to classify the carcinoma samples were largely distinct from  
141 those of the other two models [Figure 3A]. Among the OTUs that were shared across the  
142 three models were those populations generally considered beneficial to their host (e.g.  
143 *Faecalibacterium*, *Lachnospiraceae*, *Bacteroides*, *Dorea*, *Anaerostipes*, and *Roseburia*)

144 [Figures 3B]. Although many of important OTUs in the top 10% were also included in the  
145 model differentiating between patients with normal colons and those with carcinoma, this  
146 model also included OTUs affiliated with populations that have previously been associated  
147 with carcinoma (*Fusobacterium*, *Porphyromonas*, *Parvimonas*) (24–26) [Figure S2] with  
148 some individuals showing a marked decrease in relative abundance [Figure S3]. Finally,  
149 we applied these three models to the pre and post-treatment samples for each diagnosis  
150 group and quantified the change in the positive probability of the model. A decrease in  
151 the positive probability would indicate that the microbiota more closely resembled that of a  
152 patient with a normal colon. There was no significant change in the positive probability  
153 for the adenoma or advanced adenoma groups ( $P$ -value  $> 0.05$ ) [Figure 4]. The positive  
154 probability for the pre and post-treatment samples from patients diagnosed with carcinoma  
155 significantly decreased with treatment, suggesting a shift toward a normal microbiota  
156 for most individuals ( $P$ -value = 0.001). Only, 7 of the 26 patients (26.92%) who were  
157 diagnosed with a carcinoma had a higher positive probability after treatment; one of  
158 those was re-diagnosed with carcinoma on the follow up visit. These results indicate  
159 that, although there were changes in the microbiota associated with treatment, those  
160 experienced by patients with carcinoma after treatment yielded gut bacterial communities  
161 of greater similarity to that of a normal colon.

162 ***Difficult to identify effects of specific treatments on the change in the microbiota.***

163 The type of treatment that the patients received varied across diagnosis groups. Those  
164 with adenomas and advanced adenomas received surgical resection (adenoma,  $N=4$ ;  
165 advanced adenoma,  $N=4$ ) or polyp removal during colonoscopy (adenoma,  $N=18$ ;  
166 advanced adenoma,  $N=15$ ) and those with carcinomas received surgical resection ( $N=12$ ),  
167 surgical resection with chemotherapy ( $N=9$ ), and surgical resection with chemotherapy  
168 and radiation ( $N=5$ ). Regardless of treatment used there was no significant difference in  
169 the effect of these treatments on the number of observed OTUs, Shannon diversity, or  
170 Shannon evenness ( $P$ -value  $> 0.05$ ). Furthermore, there was not a significant difference in



171 the effect of the treatments on the amount of change in the community structure (P-value =  
172 0.375). Finally, the change in the positive probability was not significantly different between  
173 any of the treatment groups (P-value = 0.375). Due to the relatively small number of  
174 samples in each treatment group, it was difficult to make a definitive statement regarding  
175 the specific type of treatment on the amount of change in the structure of the microbiota.

## 176 Discussion

177 Our study focused on comparing the microbiota of patients diagnosed with adenoma,  
178 advanced adenoma, and carcinoma before and after treatment. For all three groups of  
179 patients, we observed changes in their microbiota. Some of these changes, specifically  
180 for adenoma, may be due to normal temporal variation, however, those with advanced  
181 adenoma and carcinoma clearly had large microbiota changes. After treatment, the  
182 microbiota of patients with carcinoma changed significantly more than the other groups.  
183 This change resulted in communities that more closely resembled those of patients with  
184 a normal colon. This may suggest that treatment for carcinoma is not only successful  
185 for removing the carcinoma but also at reducing the associated bacterial communities.  
186 Understanding the effect of treatment on the microbiota of those diagnosed with carcinomas  
187 may have important implications for reducing disease recurrence. It is intriguing that it  
188 may be possible to use microbiome-based biomarkers to not only predict the presence of  
189 lesions but to also assess the risk of recurrence due to these changes in the microbiota.

190 Patients diagnosed with adenoma and advanced adenoma, however, did not experience a  
191 shift towards a community structure that resembled those with normal colons. This may  
192 be due to the fundamental differences between the features of adenomas and advanced  
193 adenomas and carcinoma. Specifically, carcinomas may create an inflammatory milieu that  
194 would impact the structure of the community and removal of that stimulus would alter said  
195 structure. It is possible that the difference between the microbiota of patients with adenoma  
196 and advanced adenoma and those with normal colons is subtle. This is supported by the  
197 reduced ability of our models to correctly classify patients with adenomas and advanced  
198 adenomas relative to those diagnosed with carcinomas [Figure S1]. Given the irregular  
199 distribution of microbiota across patients in the different diagnosis groups, it is possible that  
200 we lacked the statistical power to adequately characterize the change in the communities  
201 following treatment.

202 There was a subset of patients (7 of the 26 with carcinomas) who demonstrated an elevated  
203 probability of carcinoma after treatment. This may reflect an elevated risk of recurrence.  
204 The 26.92% prevalence of increased carcinoma probability from our study is within the  
205 expected rate of recurrence (20-30% (3, 4)). We hypothesized that these individuals may  
206 have had more severe tumors; however, the tumor severity of these 7 individuals (1 with  
207 Stage I, 3 with Stage II, and 3 with Stage III) was similar to the distribution observed among  
208 the other 19 patients. We also hypothesized that we may have sampled these patients later  
209 than the rest and their communities may have reverted to a carcinoma-associated state;  
210 however, there was not a statistically significant difference in the length of time between  
211 sample collection among those whose probabilities increased (331 (246 - 358) days) or  
212 decreased (364 (301 - 434) days) (Wilcoxon Test; P-value = 0.39) (all days data displayed  
213 as median (IQR)). Finally, it is possible that these patients may not have responded to  
214 treatment as well as the other 19 patients diagnosed with carcinoma and so the microbiota  
215 may not have been impacted the same way. Again, further studies looking at the role of  
216 the microbiota in recurrence are needed to understand the dynamics following treatment.

217 Our final hypothesis was that the specific type of treatment altered the structure of  
218 the microbiome. The treatment to remove adenomas and advanced adenomas was  
219 either polyp removal or surgical resection whereas it was surgical resection alone or  
220 in combination with chemotherapy or with chemotherapy and radiation for individuals  
221 with carcinoma. Because chemotherapy and radiation target rapidly growing cells, these  
222 treatments would be more likely to cause a turnover of the colonic epithelium driving  
223 a more significant change in the structure of the microbiota. Although, we were able  
224 to test for an effect across these specific types of treatment, the number of patients in  
225 each treatment group was relatively small. Finally, those undergoing surgery would have  
226 received antibiotics and this may be a potential confounder. However, our pre-treatment  
227 stool samples were obtained before the surgery and the post-treatment samples were  
228 obtained long after any effects due to antibiotic administration on the microbiome would be

229 expected to occur (344 (266 - 408) days). We also found no difference in the community  
230 structure of those that received surgery and those that did not as a treatment for adenoma  
231 or advanced adenoma.

## 232 **Conclusion**

233 This study expands upon existing research that has established a role for the microbiota in  
234 tumorigenesis and that demonstrated the utility of microbiome-based biomarkers to predict  
235 the presence of colonic lesions. We were surprised by the lack of a consistent signal  
236 that was associated with treatment of patients with adenomas or advanced adenomas.  
237 The lack of a large effect size may be due to differences in the role of bacteria in the  
238 formation of adenomas and carcinomas or it could be due to differences in the behaviors  
239 and medications within these classes of patients. One of the most exciting of these future  
240 directions is the possibility that markers within the microbiota could be used to potentially  
241 evaluate the effect of treatment and predict recurrence for those diagnosed with carcinoma.  
242 If such an approach is effective, it might be possible to target the microbiota as part of  
243 adjuvant therapy, if the biomarkers identified play a key role in the disease process. Our  
244 data provides additional evidence on the importance of the microbiota in tumorigenesis by  
245 addressing the recovery of the microbiota after treatment and opens interesting avenues  
246 of research into how these changes may affect recurrence.

## 247 **Methods**

248 **Study Design and Patient Sampling.** Sampling and design have been previously  
249 reported in Baxter, et al (24). Briefly, samples were stored on ice for at least 24h before  
250 freezing. Although we cannot exclude that this sampling protocol may have impacted the  
251 gut microbiota composition all samples were subjected to the same methodology. Study  
252 exclusion involved those who had already undergone surgery, radiation, or chemotherapy,  
253 had colorectal cancer before a baseline fecal sample could be obtained, had IBD, a known  
254 hereditary non-polyposis colorectal cancer, or familial adenomatous polyposis. Samples  
255 used to build the models for prediction were collected either prior to a colonoscopy or  
256 between one and two weeks after initial colonoscopy. The bacterial community has been  
257 shown to normalize back to a pre-colonoscopy community within this time period (27). Our  
258 study cohort consisted of 67 individuals with an initial sample as described and a follow up  
259 sample obtained between 188 - 546 days after treatment of lesion [Table 1]. Patients were  
260 diagnosed by colonoscopic examination and histopathological review of any biopsies taken.  
261 Patients were classified as having advanced adenoma if they had an adenoma greater  
262 than 1 cm, more than three adenomas of any size, or an adenoma with villous histology.  
263 This study was approved by the University of Michigan Institutional Review Board. All study  
264 participants provided informed consent and the study itself conformed to the guidelines  
265 set out by the Helsinki Declaration. The original protocol for the study did not provide for  
266 tracking patients after the follow up samples and so it was not possible for us to ascertain  
267 their diagnosis after the completion of the study.

268 **Treatment.** For this study treatment refers specifically to the removal of a lesion with  
269 or without chemotherapy and radiation. The majority of patients undergoing treatment  
270 for adenoma or advanced adenoma were not treated surgically [Table 1] but rather via  
271 colonoscopy. All patients diagnosed with carcinomas were treated with at least surgery  
272 or a combination of surgery and chemotherapy or surgery, chemotherapy, and radiation.

273 The type of chemotherapy used for patients with CRC included Oxaliplatin, Levicovorin,  
274 Folfox, Xeloda, Capecitabine, Avastin, Fluorouracil, and Glucovorin. These were used  
275 individually or in combination with others depending on the patient [Table 1]. If an individual  
276 was treated with radiation they were also always treated with chemotherapy. Radiation  
277 therapy generally used 18 mV photons for treatment.

278 **16S rRNA Gene Sequencing.** Sequencing was completed as described by Kozich, et al.  
279 (28). DNA extraction used the 96-well Soil DNA isolation kit (MO BIO Laboratories) and  
280 an epMotion 5075 automated pipetting system (Eppendorf). The V4 variable region was  
281 amplified and the resulting product was split between four sequencing runs with normal,  
282 adenoma, and carcinoma evenly represented on each run. Each group was randomly  
283 assigned to avoid biases based on sample collection location. The pre and post-treatment  
284 samples were sequenced on the same run.

285 **Sequence Processing.** The mothur software package (v1.37.5) was used to process  
286 the 16S rRNA gene sequences and has been previously described (28). The general  
287 workflow using mothur included merging paired-end reads into contigs, filtering for low  
288 quality contigs, aligning to the SILVA database (29), screening for chimeras using UCHIME  
289 (30), classifying with a naive Bayesian classifier using the Ribosomal Database Project  
290 (RDP)(31), and clustered into Operational Taxonomic Units (OTUs) using a 97% similarity  
291 cutoff with an average neighbor clustering algorithm (32). The number of sequences for  
292 each sample was rarefied to 10523 to minimize the impacts of uneven sampling.

293 **Model Building.** The Random Forest (33) algorithm was used to create the three models  
294 used to classify pre and post-treatment samples by diagnosis (adenoma, advanced  
295 adenoma, or carcinoma) as well as to assess the probability that a sample was more  
296 similar to the patient's original diagnosis or that of a disease-free patient. All models  
297 included only OTU data obtained from 16S rRNA sequencing and were processed using  
298 the caret (v6.0.76) R package. For each model we optimized the mtry hyper-parameter,

299 which defines the number of OTUs to investigate at each split before a new division of the  
300 data was created with the Random Forest model (33). To insure that our optimization did  
301 not result in over-fitting of the data, we made 100 different 80/20 (train/test) splits of the  
302 data where the same proportion was present within both the whole data set and the 80/20  
303 split. For each of the 100 splits, 20 repeated 10-fold cross validation was performed on the  
304 80% component to optimize the mtry hyper-parameter by maximizing the AUC (Area Under  
305 the Curve of the Receiver Operator Characteristic). The resulting model was then tested  
306 on the 20% of the data that were held out. A summary of the mtry hyperparameter values  
307 that were tried is available in Table S5. The reported P-values for each model relative to a  
308 random labeling was assessed by comparing the distribution of the 100 80/20 splits for the  
309 correctly labeled data to the distribution of randomly labeled data.

310 The three diagnosis models were constructed by using the data from Baxter et al.  
311 (24), which was censored for the pre-treatment samples of the patients that we had  
312 post-treatment samples. The treatment models were then used to quantify the model  
313 probability that a patient with an initial diagnosis retained that diagnosis or a disease-free  
314 diagnosis.

315 **Statistical Analysis.** The R software package (v3.4.1) was used for all statistical analysis.  
316 Comparisons between bacterial community structure utilized PERMANOVA (34) in the  
317 vegan package (v2.4.3). Comparisons between probabilities as well as overall differences  
318 in the median relative abundance of each OTU between pre and post-treatment samples  
319 utilized a paired Wilcoxon ranked sum test. Comparisons between different treatment for  
320 lesions utilized a Kruskal Wallis test. Where multiple comparison testing was appropriate, a  
321 Benjamini-Hochberg (BH) correction was applied (35) and a corrected P-value of less than  
322 0.05 was considered significant. The P-values reported are those that were BH corrected.  
323 Model rank importance was determined by obtaining the median MDA from the 100, 20  
324 repeated 10-fold cross validation and then ranking from largest to smallest MDA.

325 ***Reproducible Methods.*** A detailed and reproducible description of how the data were  
326 processed and analyzed can be found at [https://github.com/SchlossLab/Sze\\_FollowUps\\_](https://github.com/SchlossLab/Sze_FollowUps_Microbiome_2017)  
327 [Microbiome\\_2017](https://github.com/SchlossLab/Sze_FollowUps_Microbiome_2017). Raw sequences have been deposited into the NCBI Sequence Read  
328 Archive (SRP062005 and SRP096978) and the necessary metadata can be found at [https:](https://www.ncbi.nlm.nih.gov/Traces/study/)  
329 [//www.ncbi.nlm.nih.gov/Traces/study/](https://www.ncbi.nlm.nih.gov/Traces/study/) and searching the respective SRA study accession.



## 330 **Declarations**

### 331 **Ethics approval and consent to participate**

332 The University of Michigan Institutional Review Board approved this study, and all subjects  
333 provided informed consent. This study conformed to the guidelines of the Helsinki  
334 Declaration.

### 335 **Consent for publication**

336 Not applicable.

### 337 **Availability of data and material**

338 A detailed and reproducible description of how the data were processed and analyzed can  
339 be found at [https://github.com/SchlossLab/Sze\\_followUps\\_2017](https://github.com/SchlossLab/Sze_followUps_2017). Raw sequences have  
340 been deposited into the NCBI Sequence Read Archive (SRP062005 and SRP096978) and  
341 the necessary metadata can be found at <https://www.ncbi.nlm.nih.gov/Traces/study/> and  
342 searching the respective SRA study accession.

### 343 **Competing Interests**

344 All authors declare that they do not have any relevant competing interests to report.

## 345 **Funding**

346 This study was supported by funding from the National Institutes of Health to P.  
347 Schloss (R01GM099514, P30DK034933) and to the Early Detection Research Network  
348 (U01CA86400).

## 349 **Authors' contributions**

350 All authors were involved in the conception and design of the study. MAS analyzed the  
351 data. NTB processed samples and analyzed the data. All authors interpreted the data.  
352 MAS and PDS wrote the manuscript. All authors reviewed and revised the manuscript. All  
353 authors read and approved the final manuscript.

## 354 **Acknowledgements**

355 The authors thank the Great Lakes-New England Early Detection Research Network  
356 for providing the fecal samples that were used in this study. We would also like to  
357 thank Amanda Elmore for reviewing and correcting code error and providing feedback on  
358 manuscript drafts. We would also like to thank Nicholas Lesniak for providing feedback on  
359 manuscript drafts.

## 360 **References**

- 361 1. Siegel RL, Miller KD, Jemal A. 2016. Cancer statistics, 2016. *CA: a cancer journal for*  
362 *clinicians* 66:7–30.
- 363 2. Haggard FA, Boushey RP. 2009. Colorectal cancer epidemiology: Incidence, mortality,  
364 survival, and risk factors. *Clinics in Colon and Rectal Surgery* 22:191–197.
- 365 3. Hellinger MD, Santiago CA. 2006. Reoperation for recurrent colorectal cancer. *Clinics*  
366 *in Colon and Rectal Surgery* 19:228–236.
- 367 4. Ryuk JP, Choi G-S, Park JS, Kim HJ, Park SY, Yoon GS, Jun SH, Kwon YC. 2014.  
368 Predictive factors and the prognosis of recurrence of colorectal cancer within 2 years after  
369 curative resection. *Annals of Surgical Treatment and Research* 86:143–151.
- 370 5. Institute NC. SEER Cancer Stat Facts: Colon and Rectum Cancer.
- 371 6. Goodwin AC, Destefano Shields CE, Wu S, Huso DL, Wu X, Murray-Stewart TR,  
372 Hacker-Prietz A, Rabizadeh S, Woster PM, Sears CL, Casero RA. 2011. Polyamine  
373 catabolism contributes to enterotoxigenic *Bacteroides fragilis*-induced colon tumorigenesis.  
374 *Proceedings of the National Academy of Sciences of the United States of America*  
375 108:15354–15359.
- 376 7. Abed J, Emgård JEM, Zamir G, Faroja M, Almogy G, Grenov A, Sol A, Naor R, Pikarsky  
377 E, Atlan KA, Mellul A, Chaushu S, Manson AL, Earl AM, Ou N, Brennan CA, Garrett WS,  
378 Bachrach G. 2016. Fap2 Mediates *Fusobacterium nucleatum* Colorectal Adenocarcinoma  
379 Enrichment by Binding to Tumor-Expressed Gal-GalNAc. *Cell Host & Microbe* 20:215–225.
- 380 8. Arthur JC, Gharaibeh RZ, Mühlbauer M, Perez-Chanona E, Uronis JM, McCafferty  
381 J, Fodor AA, Jobin C. 2014. Microbial genomic analysis reveals the essential role of

382 inflammation in bacteria-induced colorectal cancer. *Nature Communications* 5:4724.

383 9. Kostic AD, Chun E, Robertson L, Glickman JN, Gallini CA, Michaud M, Clancy TE,  
384 Chung DC, Lochhead P, Hold GL, El-Omar EM, Brenner D, Fuchs CS, Meyerson M, Garrett  
385 WS. 2013. *Fusobacterium nucleatum* potentiates intestinal tumorigenesis and modulates  
386 the tumor-immune microenvironment. *Cell Host & Microbe* 14:207–215.

387 10. Wu S, Rhee K-J, Albesiano E, Rabizadeh S, Wu X, Yen H-R, Huso DL, Brancati  
388 FL, Wick E, McAllister F, Housseau F, Pardoll DM, Sears CL. 2009. A human colonic  
389 commensal promotes colon tumorigenesis via activation of T helper type 17 T cell  
390 responses. *Nature Medicine* 15:1016–1022.

391 11. Zackular JP, Baxter NT, Chen GY, Schloss PD. 2016. Manipulation of the Gut Microbiota  
392 Reveals Role in Colon Tumorigenesis. *mSphere* 1.

393 12. Zackular JP, Baxter NT, Iverson KD, Sadler WD, Petrosino JF, Chen GY, Schloss PD.  
394 2013. The gut microbiome modulates colon tumorigenesis. *mBio* 4:e00692–00613.

395 13. Baxter NT, Zackular JP, Chen GY, Schloss PD. 2014. Structure of the gut microbiome  
396 following colonization with human feces determines colonic tumor burden. *Microbiome*  
397 2:20.

398 14. Flynn KJ, Baxter NT, Schloss PD. 2016. Metabolic and Community Synergy of Oral  
399 Bacteria in Colorectal Cancer. *mSphere* 1.

400 15. Wang T, Cai G, Qiu Y, Fei N, Zhang M, Pang X, Jia W, Cai S, Zhao L. 2012. Structural  
401 segregation of gut microbiota between colorectal cancer patients and healthy volunteers.  
402 *The ISME journal* 6:320–329.

403 16. Chen H-M, Yu Y-N, Wang J-L, Lin Y-W, Kong X, Yang C-Q, Yang L, Liu Z-J, Yuan Y-Z,  
404 Liu F, Wu J-X, Zhong L, Fang D-C, Zou W, Fang J-Y. 2013. Decreased dietary fiber intake

405 and structural alteration of gut microbiota in patients with advanced colorectal adenoma.  
406 *The American Journal of Clinical Nutrition* 97:1044–1052.

407 17. Chen W, Liu F, Ling Z, Tong X, Xiang C. 2012. Human intestinal lumen and  
408 mucosa-associated microbiota in patients with colorectal cancer. *PLoS One* 7:e39743.

409 18. Shen XJ, Rawls JF, Randall T, Burcal L, Mpande CN, Jenkins N, Jovov B, Abdo Z,  
410 Sandler RS, Keku TO. 2010. Molecular characterization of mucosal adherent bacteria and  
411 associations with colorectal adenomas. *Gut Microbes* 1:138–147.

412 19. Kostic AD, Gevers D, Pedamallu CS, Michaud M, Duke F, Earl AM, Ojesina AI,  
413 Jung J, Bass AJ, Taberero J, Baselga J, Liu C, Shivdasani RA, Ogino S, Birren BW,  
414 Huttenhower C, Garrett WS, Meyerson M. 2012. Genomic analysis identifies association  
415 of *Fusobacterium* with colorectal carcinoma. *Genome Research* 22:292–298.

416 20. Feng Q, Liang S, Jia H, Stadlmayr A, Tang L, Lan Z, Zhang D, Xia H, Xu X, Jie Z,  
417 Su L, Li X, Li X, Li J, Xiao L, Huber-Schönauer U, Niederseer D, Xu X, Al-Aama JY, Yang  
418 H, Wang J, Kristiansen K, Arumugam M, Tilg H, Datz C, Wang J. 2015. Gut microbiome  
419 development along the colorectal adenoma-carcinoma sequence. *Nature Communications*  
420 6:6528.

421 21. Dejea CM, Wick EC, Hechenbleikner EM, White JR, Mark Welch JL, Rossetti BJ,  
422 Peterson SN, Snesrud EC, Borisy GG, Lazarev M, Stein E, Vadivelu J, Roslani AC, Malik  
423 AA, Wanyiri JW, Goh KL, Thevambiga I, Fu K, Wan F, Llosa N, Housseau F, Romans  
424 K, Wu X, McAllister FM, Wu S, Vogelstein B, Kinzler KW, Pardoll DM, Sears CL. 2014.  
425 Microbiota organization is a distinct feature of proximal colorectal cancers. *Proceedings of*  
426 *the National Academy of Sciences of the United States of America* 111:18321–18326.

427 22. Mima K, Sukawa Y, Nishihara R, Qian ZR, Yamauchi M, Inamura K, Kim SA, Masuda  
428 A, Nowak JA, Nosho K, Kostic AD, Giannakis M, Watanabe H, Bullman S, Milner DA,

429 Harris CC, Giovannucci E, Garraway LA, Freeman GJ, Dranoff G, Chan AT, Garrett WS,  
430 Huttenhower C, Fuchs CS, Ogino S. 2015. *Fusobacterium nucleatum* and T Cells in  
431 Colorectal Carcinoma. *JAMA oncology* 1:653–661.

432 23. Arthur JC, Perez-Chanona E, Mühlbauer M, Tomkovich S, Uronis JM, Fan T-J, Campbell  
433 BJ, Abujamel T, Dogan B, Rogers AB, Rhodes JM, Stintzi A, Simpson KW, Hansen JJ,  
434 Keku TO, Fodor AA, Jobin C. 2012. Intestinal inflammation targets cancer-inducing activity  
435 of the microbiota. *Science (New York, NY)* 338:120–123.

436 24. Baxter NT, Ruffin MT, Rogers MAM, Schloss PD. 2016. Microbiota-based model  
437 improves the sensitivity of fecal immunochemical test for detecting colonic lesions. *Genome*  
438 *Medicine* 8:37.

439 25. Zeller G, Tap J, Voigt AY, Sunagawa S, Kultima JR, Costea PI, Amiot A, Böhm J, Brunetti  
440 F, Habermann N, Hercog R, Koch M, Luciani A, Mende DR, Schneider MA, Schrotz-King  
441 P, Tournigand C, Tran Van Nhieu J, Yamada T, Zimmermann J, Benes V, Kloor M, Ulrich  
442 CM, Knebel Doeberitz M von, Sobhani I, Bork P. 2014. Potential of fecal microbiota for  
443 early-stage detection of colorectal cancer. *Molecular Systems Biology* 10:766.

444 26. Zackular JP, Rogers MAM, Ruffin MT, Schloss PD. 2014. The human gut microbiome  
445 as a screening tool for colorectal cancer. *Cancer Prevention Research (Philadelphia, Pa)*  
446 7:1112–1121.

447 27. O'Brien CL, Allison GE, Grimpen F, Pavli P. 2013. Impact of colonoscopy bowel  
448 preparation on intestinal microbiota. *PloS One* 8:e62815.

449 28. Kozich JJ, Westcott SL, Baxter NT, Highlander SK, Schloss PD. 2013. Development of  
450 a dual-index sequencing strategy and curation pipeline for analyzing amplicon sequence  
451 data on the MiSeq Illumina sequencing platform. *Applied and Environmental Microbiology*

452 79:5112–5120.

453 29. Pruesse E, Quast C, Knittel K, Fuchs BM, Ludwig W, Peplies J, Glöckner FO. 2007.

454 SILVA: A comprehensive online resource for quality checked and aligned ribosomal RNA

455 sequence data compatible with ARB. *Nucleic Acids Research* 35:7188–7196.

456 30. Edgar RC, Haas BJ, Clemente JC, Quince C, Knight R. 2011. UCHIME

457 improves sensitivity and speed of chimera detection. *Bioinformatics (Oxford, England)*

458 27:2194–2200.

459 31. Wang Q, Garrity GM, Tiedje JM, Cole JR. 2007. Naive Bayesian classifier for

460 rapid assignment of rRNA sequences into the new bacterial taxonomy. *Applied and*

461 *Environmental Microbiology* 73:5261–5267.

462 32. Schloss PD, Westcott SL. 2011. Assessing and improving methods used in operational

463 taxonomic unit-based approaches for 16S rRNA gene sequence analysis. *Applied and*

464 *Environmental Microbiology* 77:3219–3226.

465 33. Breiman L. 2001. Random Forests. *Machine Learning* 45:5–32.

466 34. Anderson MJ, Walsh DCI. 2013. PERMANOVA, ANOSIM, and the Mantel test in

467 the face of heterogeneous dispersions: What null hypothesis are you testing? *Ecological*

468 *Monographs* 83:557–574.

469 35. Benjamini Y, Hochberg Y. 1995. Controlling the false discovery rate: A practical and

470 powerful approach to multiple testing. *Journal of the Royal Statistical Society Series B*

471 (Methodological) 57:289–300.

472 **Table 1: Demographic data of patients in the pre and post-treatment cohort**

|                                          | Adenoma         | Advanced Adenoma | Carcinoma        |
|------------------------------------------|-----------------|------------------|------------------|
| n                                        | 22              | 19               | 26               |
| Age (Mean $\pm$ SD)                      | 61.68 $\pm$ 7.2 | 63.11 $\pm$ 10.9 | 61.65 $\pm$ 12.9 |
| Sex (%F)                                 | 36.36           | 36.84            | 42.31            |
| BMI (Mean $\pm$ SD)                      | 26.86 $\pm$ 3.9 | 25.81 $\pm$ 4.7  | 28.63 $\pm$ 7.2  |
| Caucasian (%)                            | 95.45           | 84.21            | 96.15            |
| Days Between Colonoscopy (Mean $\pm$ SD) | 255.41 $\pm$ 42 | 250.16 $\pm$ 41  | 350.85 $\pm$ 102 |
| Surgery Only                             | 4               | 4                | 12               |
| Surgery & Chemotherapy                   | 0               | 0                | 9                |
| Surgery, Chemotherapy, & Radiation       | 0               | 0                | 5                |



473 **Table 2: Demographic data of training cohort**

|                     | Normal          | Adenoma          | Advanced Adenoma | Carcinoma        |
|---------------------|-----------------|------------------|------------------|------------------|
| n                   | 172             | 67               | 90               | 94               |
| Age (Mean $\pm$ SD) | 54.29 $\pm$ 9.9 | 63.01 $\pm$ 13.1 | 64.07 $\pm$ 11.3 | 64.37 $\pm$ 12.9 |
| Sex (%F)            | 64.53           | 46.27            | 37.78            | 43.62            |
| BMI (Mean $\pm$ SD) | 26.97 $\pm$ 5.3 | 25.69 $\pm$ 4.8  | 26.66 $\pm$ 4.9  | 29.27 $\pm$ 6.7  |
| Caucasian (%)       | 87.79           | 92.54            | 92.22            | 94.68            |

474 **Figure 1: General differences between adenoma, advanced adenoma, and**  
475 **carcinoma groups after treatment.** A)  $\theta_{YC}$  distances from pre versus post sample within  
476 each individual. A significant difference was found between the adenoma and carcinoma  
477 group (P-value = 5.36e-05). Solid black points represent the median value for each  
478 diagnosis group. B) NMDS of the pre and post-treatment samples for the adenoma group.  
479 C) NMDS of the pre and post-treatment samples for the advanced adenoma group. D)  
480 NMDS of the pre and post-treatment samples for the carcinoma group.

481 **Figure 2: The top 10 most important OTUs used to classify treatment for adenoma,**  
482 **advanced adenoma, and carcinoma.** A) Adenoma OTUs. B) Advanced Adenoma OTUs.  
483 C) Carcinoma OTUs. The darker circle highlights the median log<sub>10</sub> MDA value obtained  
484 from 100 different 80/20 splits while the lighter colored circles represents the value obtained  
485 for a specific run.

486 **Figure 3: Top 10% most important OTUs common to those models used to**  
487 **differentiate between patients with normal colons and those with adenoma,**  
488 **advanced adenoma, and carcinoma.** A) Venn diagram showing the OTU overlap  
489 between each model. B) For each common OTU the lowest taxonomic identification and  
490 importance rank for each model run is shown.

491 **Figure 4: Treatment response based on models built for adenoma, advanced**  
492 **adenoma, or carcinoma.** A) Positive probability change from initial to follow up sample in  
493 those with adenoma. B) Positive probability change from initial to follow up sample in those  
494 with advanced adenoma. C) Positive probability change from initial to follow up sample in  
495 those with carcinoma.

496 **Figure S1: ROC curves of the adenoma, advanced adenoma, and carcinoma**  
497 **models.** A) Adenoma ROC curve: The light green shaded areas represent the range of  
498 values of a 100 different 80/20 splits of the test set data and the dark green line represents  
499 the model using 100% of the data set and what was used for subsequent classification. B)  
500 Advanced Adenoma ROC curve: The light yellow shaded areas represent the range of  
501 values of a 100 different 80/20 splits of the test set data and the dark yellow line represents  
502 the model using 100% of the data set and what was used for subsequent classification. C)  
503 Carcinoma ROC curve: The light red shaded areas represent the range of values of a 100  
504 different 80/20 splits of the test set data and the dark red line represents the model using  
505 100% of the data set and what was used for subsequent classification.

506 **Figure S2: Summary of top 10% of important OTUs for the adenoma, advanced**  
507 **adenoma, and carcinoma models.** A) MDA of the most important variables in the  
508 adenoma model. The dark green point represents the mean and the lighter green points  
509 are the value of each of the 100 different runs. B) Summary of Important Variables in the  
510 advanced adenoma model. MDA of the most important variables in the SRN model. The  
511 dark yellow point represents the mean and the lighter yellow points are the value of each  
512 of the 100 different runs. C) MDA of the most important variables in the carcinoma model.  
513 The dark red point represents the mean and the lighter red points are the value of each of  
514 the 100 different runs.

515 **Figure S3: Pre and post-treatment relative abundance of CRC associated OTUs**  
516 **within the carcinoma model.**

**A**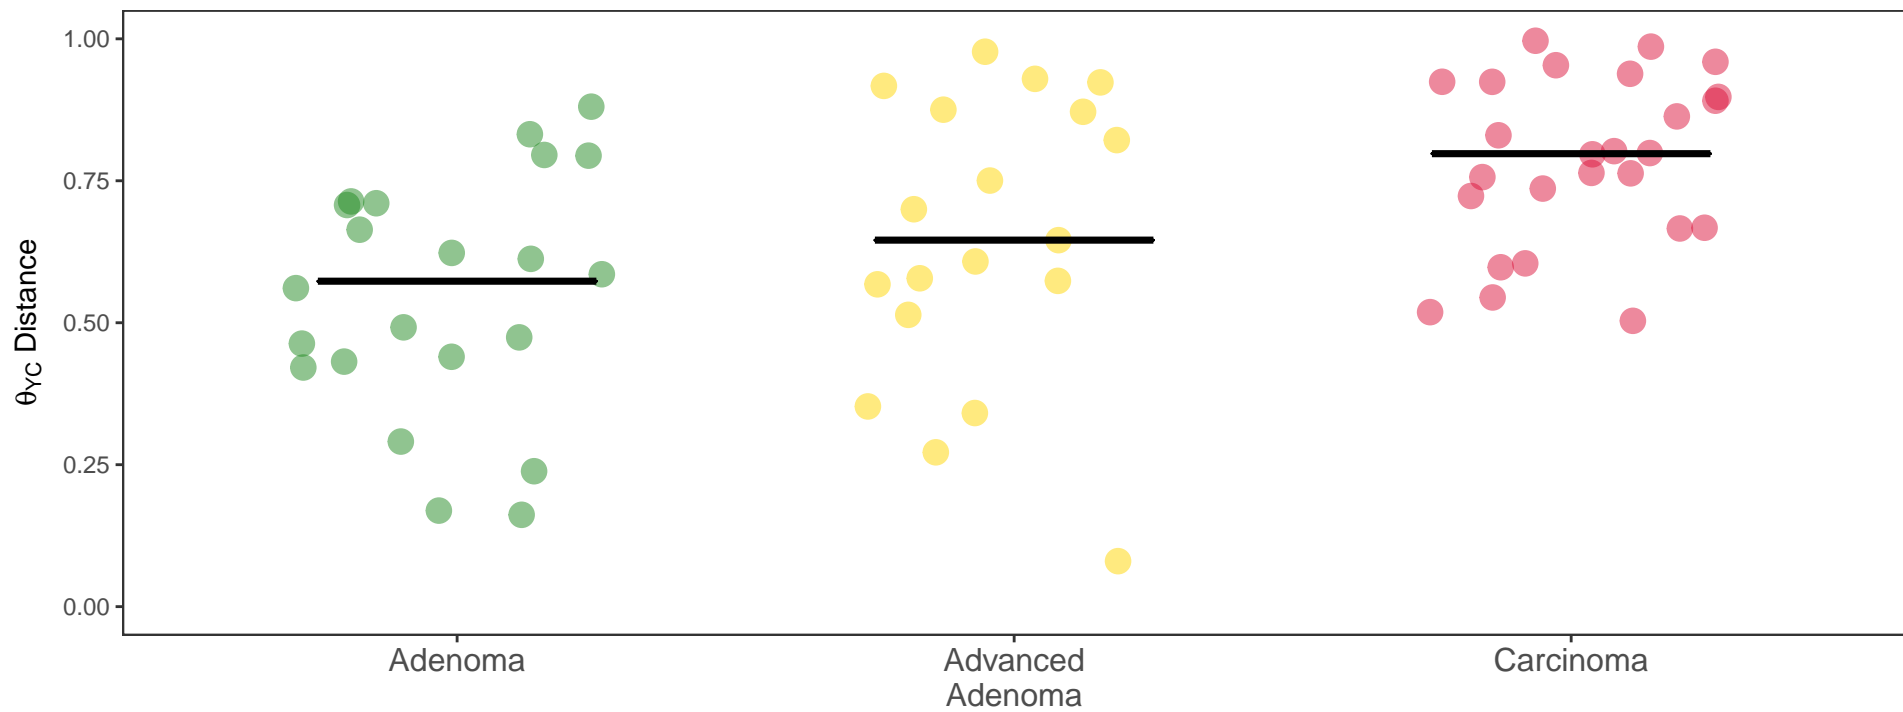**B**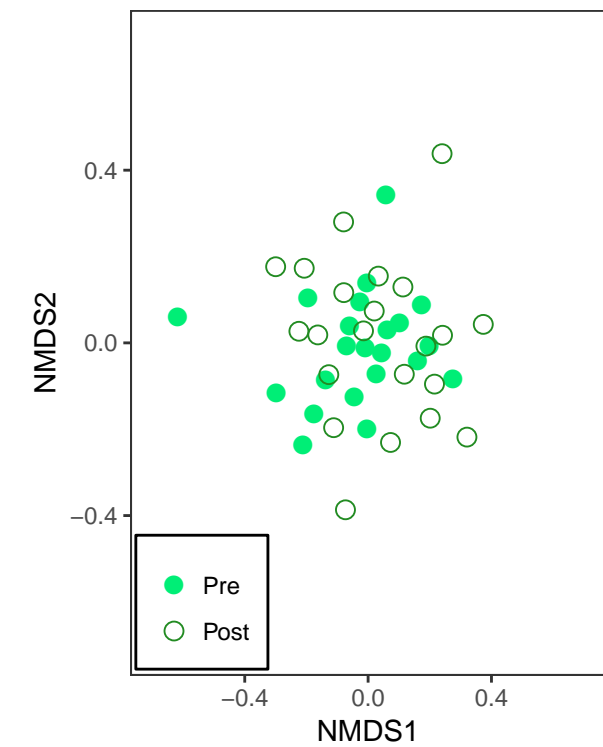**C**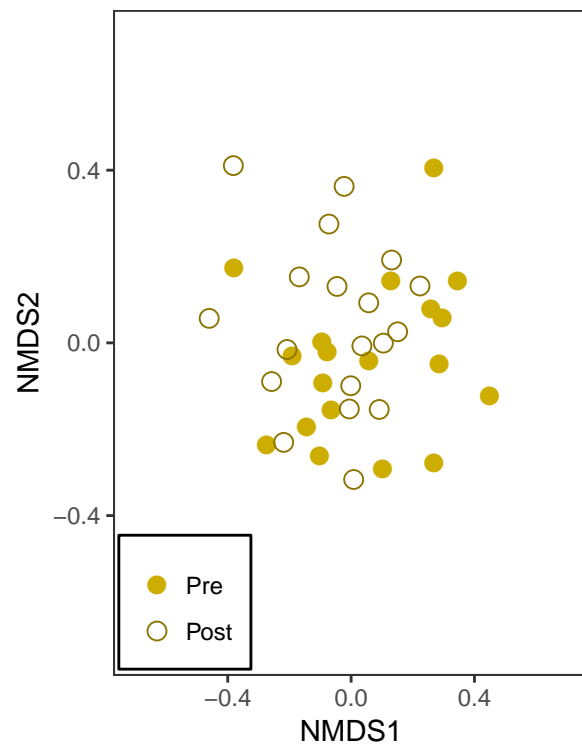**D**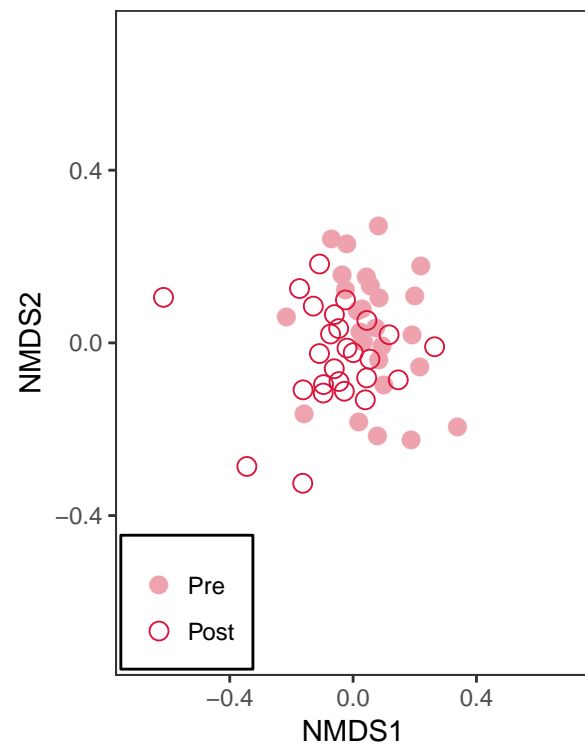

**A**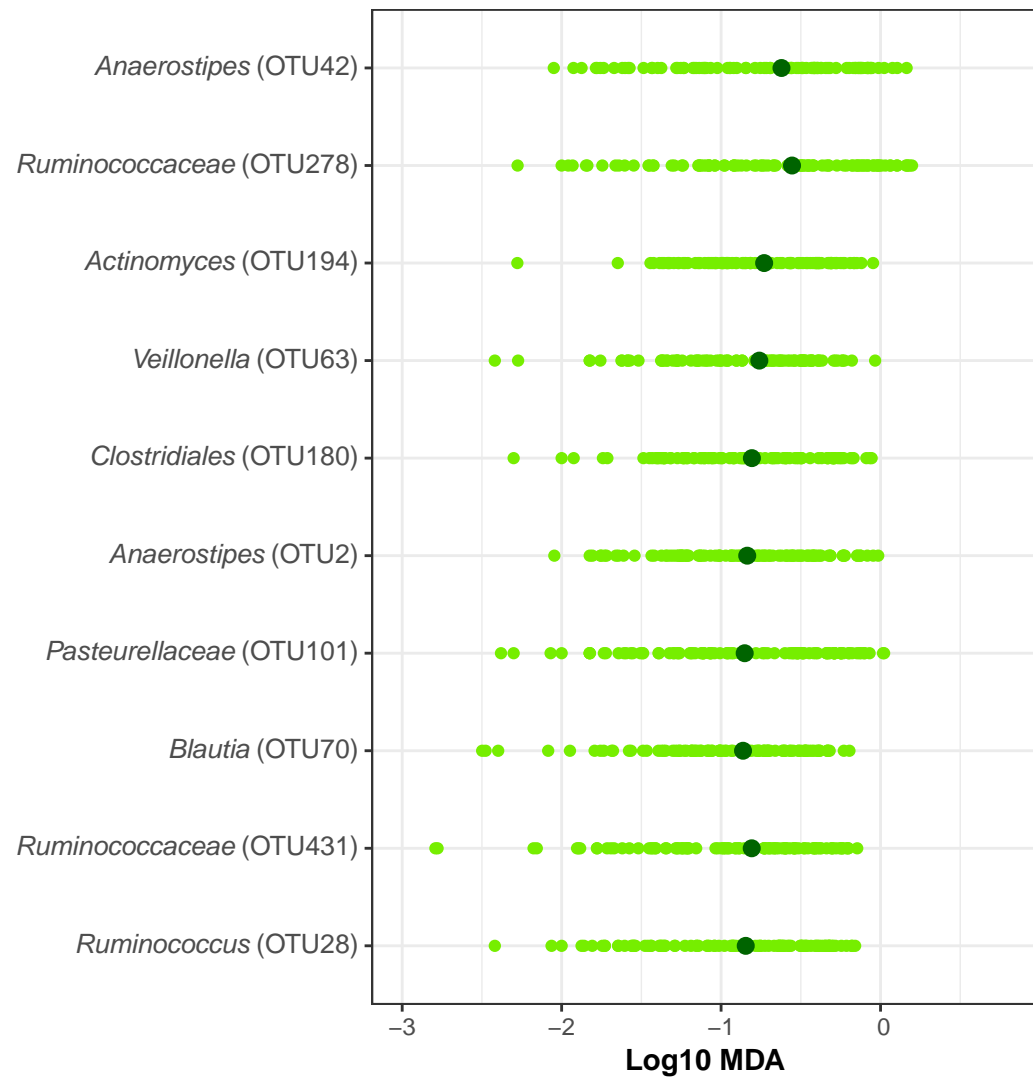**B**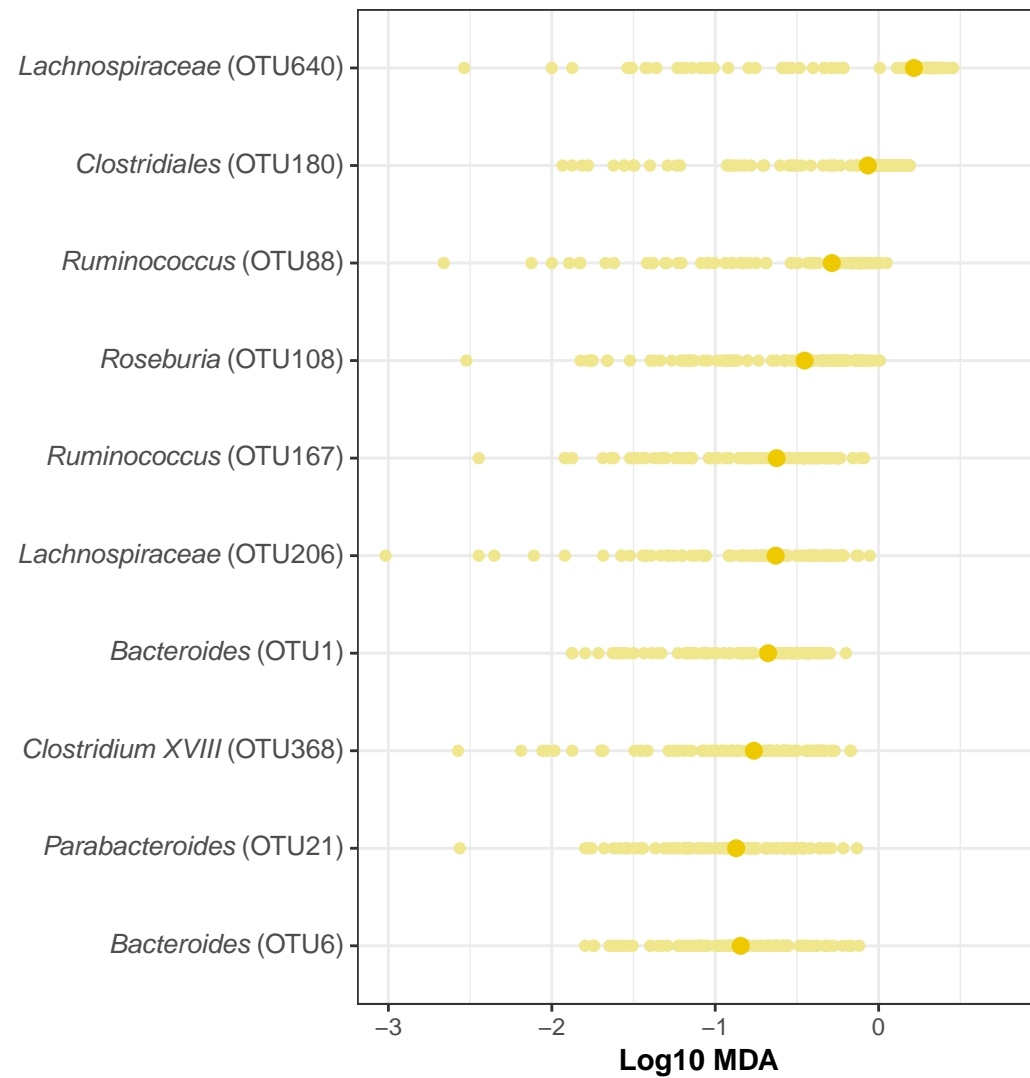**C**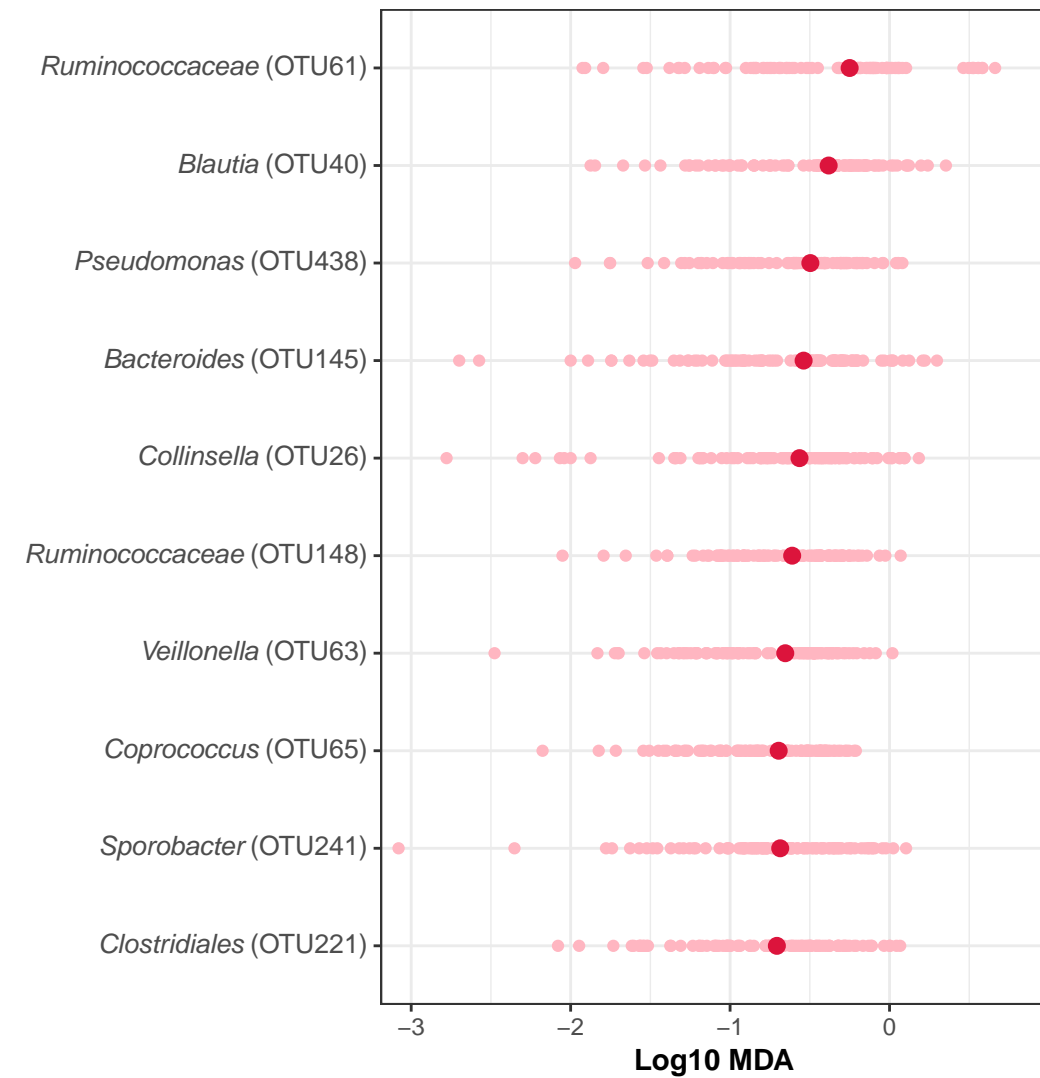

**A****Adenoma****Advanced Adenoma**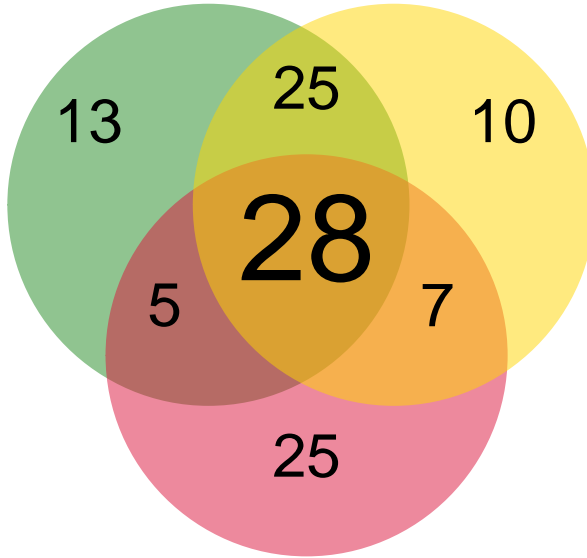**Carcinoma****B**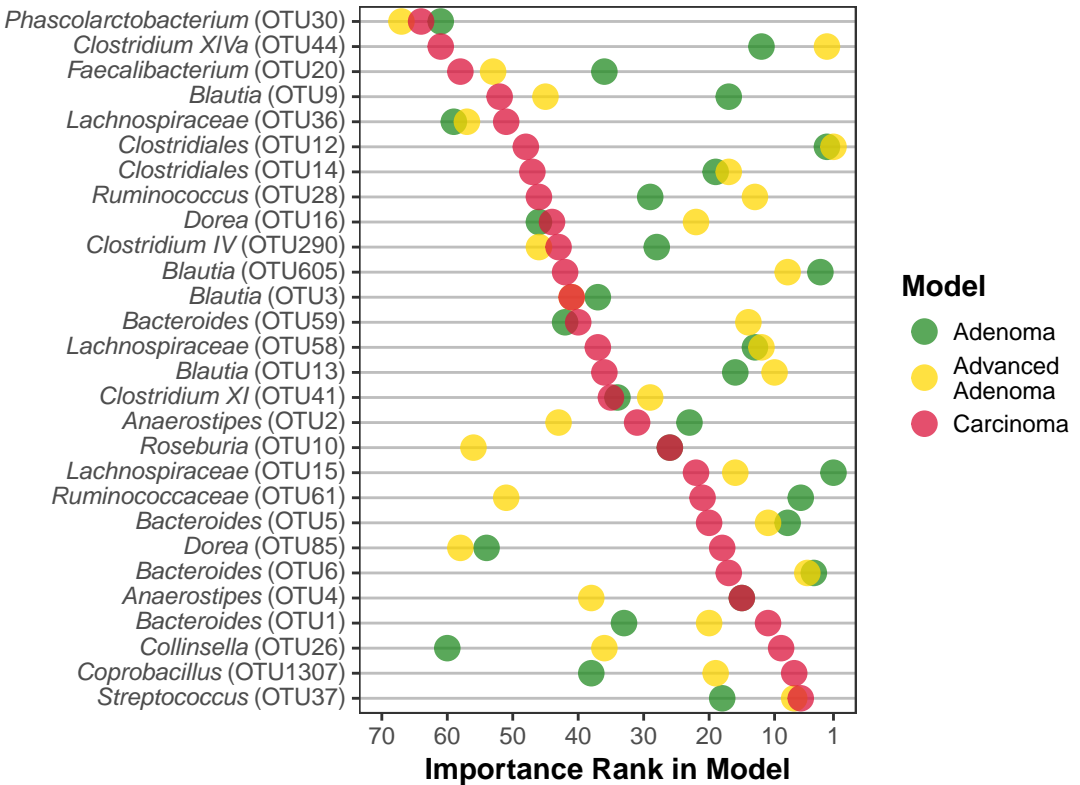

**A**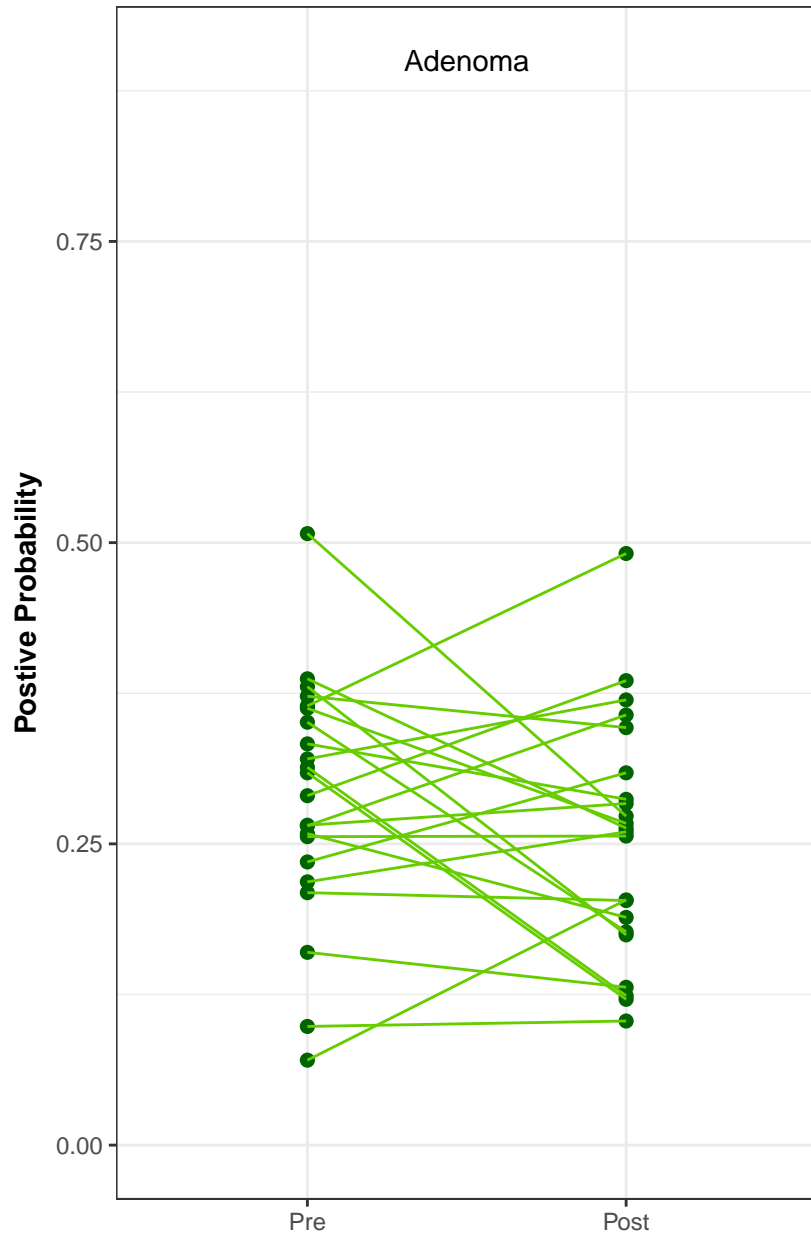**B**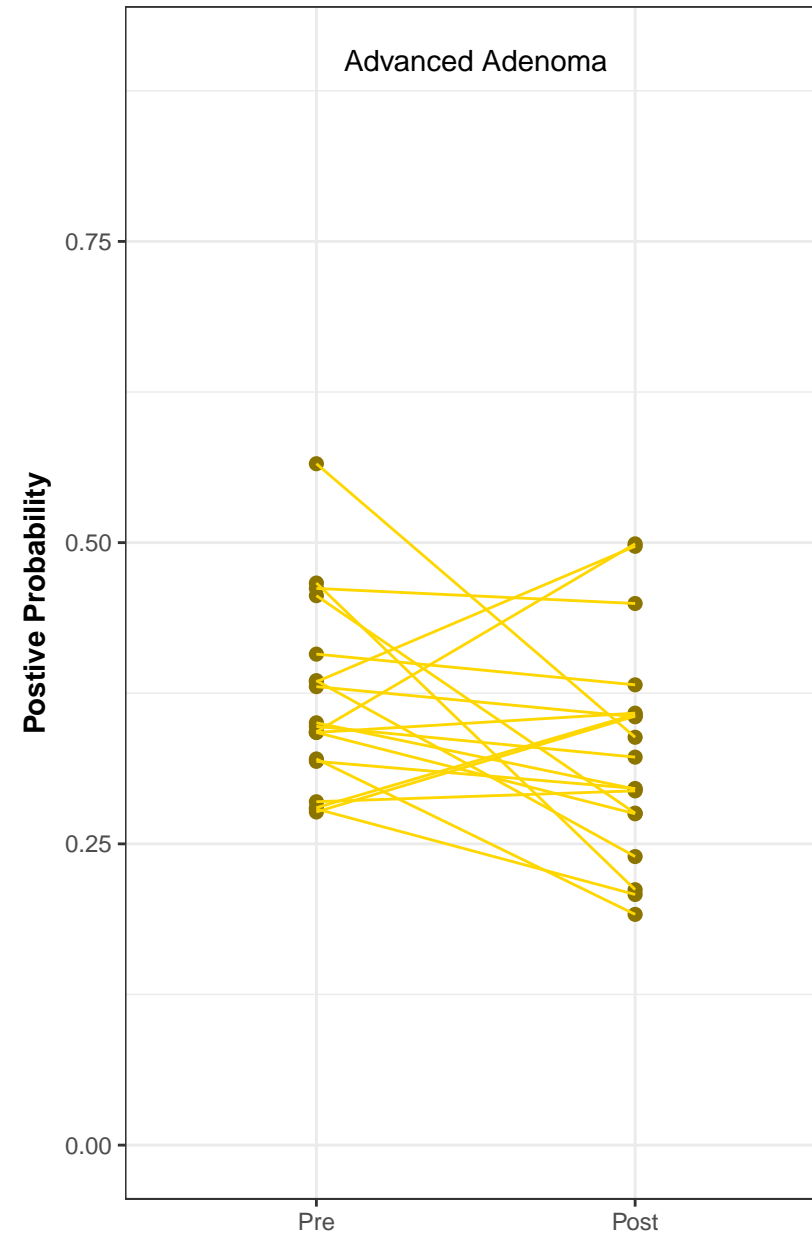**C**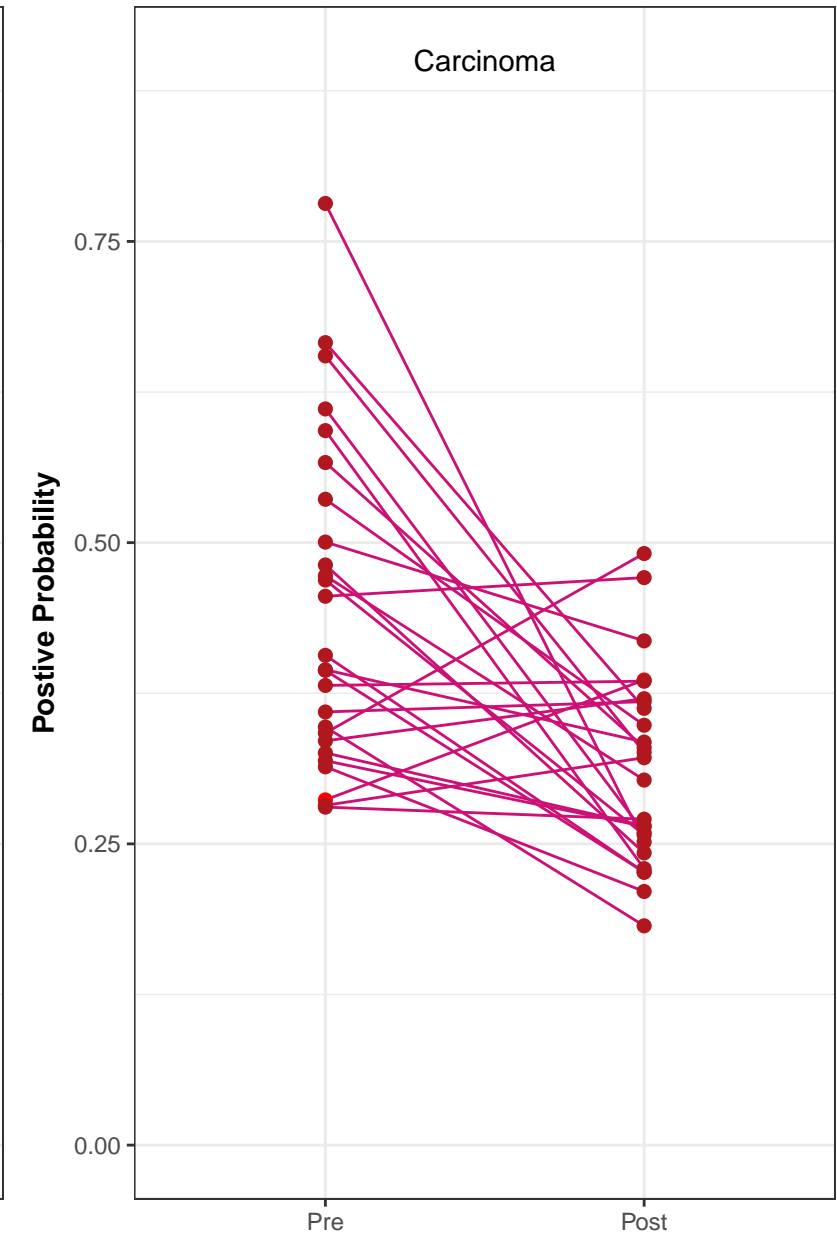

Source: http://www.biorxiv.org/content/10.1101/138222v3.full.pdf
